# Supplementary material
Source: PubMed Central journal article supplement (PMC3567703)
Supplement: Supp_Table1.pdf [file Supp_Table1.pdf]

## Supplementary Data

SUPPLEMENTARY TABLE S1. PRIMERS USED FOR RT-PCR

| <i>Gene</i>      | <i>Primer</i>                    |      | <i>Amplification efficiency (%)</i> |
|------------------|----------------------------------|------|-------------------------------------|
| <i>β-Actin</i>   |                                  |      |                                     |
| F                | 5'-GAAATCGTGCGTGACATCAAAGA-3'    | 63°C | 98.4                                |
| R                | 5'-CCCAAGAAGGAAGGCTGGAAAA-3'     |      |                                     |
| <i>Dnmt1</i>     |                                  |      |                                     |
| F                | 5'-CAATTCAGCACCCCTCATCCCC-3'     | 60°C | 104.2                               |
| R                | 5'-ATTCCCGAACACTCACGACCC-3'      |      |                                     |
| <i>Dnmt3a</i>    |                                  |      |                                     |
| F                | 5'-TTTGTCTGCGACTCCTTT-3'         | 55°C | 99.5                                |
| R                | 5'-GTCTGTTGCTGCTCTGGT-3'         |      |                                     |
| <i>Dnmt3b</i>    |                                  |      |                                     |
| F                | 5'-CGTTCCTTATCTGAGCAGTGTTT-3'    | 48°C | 99.4                                |
| R                | 5'-TTTCTTATCTCCAGTGATGCCCTA-3'   |      |                                     |
| <i>Dnmt3L</i>    |                                  |      |                                     |
| F                | 5'-CCCTTCTAGCCGATTACATCAA-3'     | 60°C | 102.1                               |
| R                | 5'-CACATCCACACTGTCTCCTTC-3'      |      |                                     |
| <i>Kdm6a</i>     |                                  |      |                                     |
| F                | 5'-ACAAAACCTGGCAACATCATAAAG-3'   | 55°C | 95.2                                |
| R                | 5'-AAAGGTGACCAAAGAAAGACTAA-3'    |      |                                     |
| <i>Kdm6b</i>     |                                  |      |                                     |
| F                | 5'-TAAAGAACTATGAGGAAAAGAAACCC-3' | 55°C | 95.3                                |
| R                | 5'-GAAAAAAACCGAACTAAGAAAATGAA-3' |      |                                     |
| <i>Aicda</i>     |                                  |      |                                     |
| F                | 5'-TAAGGTGAGACCCTATTTCAAACAAC-3' | 60°C |                                     |
| R                | 5'-GACCAGACATAAAGAGGGACAAACT-3'  |      |                                     |
| <i>Ezh2</i>      |                                  |      |                                     |
| F                | 5'-CCACAGGATAGGCATCTTTG-3'       | 48°C | 96.6                                |
| R                | 5'-AGAAGGGGAAGAGGTAGTAG-3'       |      |                                     |
| <i>Lsd1</i>      |                                  |      |                                     |
| F                | 5'-CCGGGGCTCCTATTCTTATGTG-3'     | 55°C | 94.5                                |
| R                | 5'-AAAACCTGGTCGGCAATCCTTCC-3'    |      |                                     |
| <i>Mll1</i>      |                                  |      |                                     |
| F                | 5'-GCTCAATCAAATACCTGAAAATAC-3'   | 52°C | 100.6                               |
| R                | 5'-CAACAACAATAACAACAAAAAACA-3'   |      |                                     |
| <i>Kat2a</i>     |                                  |      |                                     |
| F                | 5'-GAAGCCACTGGGAAAGGAGAAG-3'     | 54°C | 102.1                               |
| R                | 5'-GGTCAATGGGGAAACGGATAAC-3'     |      |                                     |
| <i>TET1</i>      |                                  |      |                                     |
| F                | 5'-GTGAGTCGTCTTGCCAACATC-3'      | 58°C | 101.9                               |
| R                | 5'-CCTAGTAACCCAAATAGAGCC-3'      |      |                                     |
| <i>endo-Oct4</i> |                                  |      |                                     |
| F                | 5'-TCTTTCCACCAGGCCCGGCTC-3'      | 60°C | 90.1                                |
| R                | 5'-TGCGGGCGGACATGGGGAGATCC-3'    |      |                                     |
| <i>Nnog</i>      |                                  |      |                                     |
| F                | 5'-TCTTCCTGGTCCCCACAGTTT-3'      | 60°C | 94.3                                |
| R                | 5'-GCAAGAATAGTTCTCGGGATGAA-3'    |      |                                     |
| <i>Meg3</i>      |                                  |      |                                     |
| F                | 5'-GACTCGTGTGCCCATTCCTTC-3'      | 55°C | 92.1                                |
| R                | 5'-ATGTCCCCATCTTTCTTTCA-3'       |      |                                     |

F, Forward; R, reverse.
