# Supplementary material
Source: PubMed Central journal article supplement (PMC3567703)
Supplement: Supp_Table2.pdf [file Supp_Table2.pdf]

SUPPLEMENTARY TABLE S2. PRIMERS USED FOR BISULFATE SEQUENCING

|                 |  |  |  |  |  |  |  |  |  |
|-----------------|--|--|--|--|--|--|--|--|--|
| MeOCT4          |  |  |  |  |  |  |  |  |  |
| Outside forward |  |  |  |  |  |  |  |  |  |
| Inside forward  |  |  |  |  |  |  |  |  |  |
| Reverse         |  |  |  |  |  |  |  |  |  |
| MeIGF2R DMR2    |  |  |  |  |  |  |  |  |  |
| forward         |  |  |  |  |  |  |  |  |  |
| Outside reverse |  |  |  |  |  |  |  |  |  |
| Inside reverse  |  |  |  |  |  |  |  |  |  |
| Line1           |  |  |  |  |  |  |  |  |  |
| Outside forward |  |  |  |  |  |  |  |  |  |
| Outside reverse |  |  |  |  |  |  |  |  |  |
| Inside forward  |  |  |  |  |  |  |  |  |  |
| Inside reverse  |  |  |  |  |  |  |  |  |  |
| H19             |  |  |  |  |  |  |  |  |  |
| Outside forward |  |  |  |  |  |  |  |  |  |
| Outside reverse |  |  |  |  |  |  |  |  |  |
| Inside forward  |  |  |  |  |  |  |  |  |  |
| Inside reverse  |  |  |  |  |  |  |  |  |  |
| Peg3            |  |  |  |  |  |  |  |  |  |
| Outside forward |  |  |  |  |  |  |  |  |  |
| Outside reverse |  |  |  |  |  |  |  |  |  |
| Inside forward  |  |  |  |  |  |  |  |  |  |
| Inside reverse  |  |  |  |  |  |  |  |  |  |
| Peg10           |  |  |  |  |  |  |  |  |  |
| Forward         |  |  |  |  |  |  |  |  |  |
| Outside reverse |  |  |  |  |  |  |  |  |  |
| Inside reverse  |  |  |  |  |  |  |  |  |  |
| Meg3            |  |  |  |  |  |  |  |  |  |
| Outside forward |  |  |  |  |  |  |  |  |  |
| Inside forward  |  |  |  |  |  |  |  |  |  |
| Reverse         |  |  |  |  |  |  |  |  |  |
| MeXist Region 1 |  |  |  |  |  |  |  |  |  |
| Outside forward |  |  |  |  |  |  |  |  |  |
| Inside forward  |  |  |  |  |  |  |  |  |  |
| Reverse         |  |  |  |  |  |  |  |  |  |
| MeXist Region 2 |  |  |  |  |  |  |  |  |  |
| forward         |  |  |  |  |  |  |  |  |  |
| Outside reverse |  |  |  |  |  |  |  |  |  |
| Inside reverse  |  |  |  |  |  |  |  |  |  |

|                 | <i>First round</i> |                                          |               |              | <i>Second round</i>        |                 |              |                             |                 |
|-----------------|--------------------|------------------------------------------|---------------|--------------|----------------------------|-----------------|--------------|-----------------------------|-----------------|
| MeOCT4          | 94°C<br>30 s       | 56°C (–1°C per cycle)<br>1 min<br>cycles | 72°C<br>1 min | 94°C<br>30 s | 51°C<br>45 s<br>30 cycles  | 72°C<br>1.3 min | 94°C<br>30 s | 53.5°C<br>60 s<br>30 cycles | 72°C<br>1.3 min |
| MeIGF2R DMR2    | 94°C<br>1 min      | 50°C<br>2 min<br>5 cycles                | 72°C<br>3 min | 94°C<br>30 s | 50°C<br>2 min<br>30 cycles | 72°C<br>1.5 min | 94°C<br>30 s | 54°C<br>2 min<br>1.5 min    | 72°C<br>1.5 min |
| Line1           | 94°C<br>30 s       | 50°C<br>30 s<br>30 cycles                | 72°C<br>1 min |              |                            |                 | 94°C<br>30 s | 56°C<br>30 s<br>30 cycles   | 72°C<br>1 min   |
| H19             | 94°C<br>30 s       | 50°C<br>30 s<br>30 cycles                | 72°C<br>1 min |              |                            |                 | 94°C<br>30 s | 50°C<br>30 s<br>30 cycles   | 72°C<br>1 min   |
| Peg3            | 94°C<br>30 s       | 50°C<br>30 s<br>30 cycles                | 72°C<br>1 min |              |                            |                 | 94°C<br>30 s | 50°C<br>30 s<br>30 cycles   | 72°C<br>1 min   |
| Peg10           | 94°C<br>30 s       | 50°C<br>30 s<br>30 cycles                | 72°C<br>1 min |              |                            |                 | 94°C<br>30 s | 50°C<br>30 s<br>30 cycles   | 72°C<br>1 min   |
| Meg3            | 94°C<br>30 s       | 50°C<br>30 s<br>30 cycles                | 72°C<br>1 min |              |                            |                 | 94°C<br>30 s | 50°C<br>30 s<br>30 cycles   | 72°C<br>1 min   |
| MeXistRegion 1  | 94°C<br>30 s       | 60°C (–1°C per cycle)<br>1 min<br>cycles | 72°C<br>1 min | 94°C<br>30 s | 51°C<br>1 min<br>30 cycles | 72°C<br>1 min   | 94°C<br>30 s | 51°C<br>1 min<br>30 cycles  | 72°C<br>1 min   |
| MeXist Region 2 | 94°C<br>30 s       | 60°C (–1°C per cycle)<br>1 min<br>cycles | 72°C<br>1 min | 94°C<br>30 s | 51°C<br>1 min<br>30 cycles | 72°C<br>1 min   | 94°C<br>30 s | 51°C<br>1 min<br>30 cycles  | 72°C<br>1 min   |
